# Supplementary material for: The DeepMIP contribution to PMIP4: experimental design for model simulations of the EECO, PETM, and pre-PETM (version 1.0)
Source: Copernicus journal article supplement (doi:10.5194/gmd-10-889-2017), 2017-02-23
Supplement: Supplementary file 1 [file BIOME4-CLM4_translation_table.xlsx]

## Sheet: Sheet1
BIOME4	Color triplet				CLM 4.5 PFT (following Table 2.1 of Oleson et al., CLM Tech note, 2013)						PFT cover percentages; values are zero if left blank
ID	R	G	B	Biome name	NET Temperate	NET Boreal	NDT Boreal	BET Tropical	BET Temperate	BDT Tropical	BDT Temperate	BDT Boreal	BES Temperate	BDS Temperate	BDS Boreal	C3 arctic grass	C3 grass	C4 grass	total vegetation cover	note
1	0	102	26	Tropical evergreen broadleaf forest				100											100
2	77	128	26	Tropical semi-evergreen broadleaf forest				50		50									100
3	153	102	26	Tropical deciduous broadleaf forest and woodland						100									100
4	0	200	0	Temperate deciduous broadleaf forest							100								100
5	0	102	102	Temperate evergreen needleleaf forest	100														100
6	0	26	128	Warm-temperate evergreen broadleaf and mixed forest	33				33		33								99
7	204	255	204	Cool mixed forest	50				50										100
8	0	153	51	Cool evergreen needleleaf forest		50			50										100
9	128	51	77	Cool-temperate evergreen needleleaf and mixed forest		50					25	25							100
10	26	26	230	Cold evergreen needleleaf forest		80						10			10				100
11	51	204	255	Cold deciduous forest			85								15				100
12	179	230	26	Tropical savanna						50								50	100
13	255	179	153	Tropical xerophytic shrubland						100									100	should be shrubs not trees
14	255	217	179	Temperate xerophytic shrubland					40				60						100
15	102	153	0	Temperate sclerophyll woodland and shrubland					60				20				20		100
16	204	204	0	Temperate broadleaved savanna							50						50	50	150	C3 and C4 grasses coexist at different times of year (if your modeling approach does not allow for asynchronous coexistence, reduce to even proportions)
17	255	153	230	Temperate deciduous broadleaf savanna	50												50		100
18	155	127	255	Cold parkland		50	50								40	10			150	the proportion of the deciduous needleleaf tree cover will depend on the presence of needleleaf evergreens and should be adjusted to reach 100%
19	230	179	77	Tropical grassland														100	100
20	255	229	127	Temperate grassland													100	100	200	C3 and C4 grasses coexist at different times of year (if your modeling approach does not allow for asynchronous coexistence, reduce to even proportions)
21	255	255	230	Desert													2.5	2.5	5	total cover could vary as a function of interannually variable climate
22	230	230	0	Graminoid and forb tundra												100			100
23	102	230	128	Low and high shrub tundra											100				100
24	128	128	51	Erect dwarf shrub tundra											90	10			100
25	204	153	153	Prostrate dwarf shrub tundra											75	25			100
26	179	153	255	Cushion-forbs, lichens and moss												50			50
27	204	204	179	Barren															0	e.g., for stony deserts, sand, bare rock, salt flats, etc.
28	204	255	255	Land ice															0	for icecaps and glaciers
