# Supplementary material for: The DeepMIP contribution to PMIP4: experimental design for model simulations of the EECO, PETM, and pre-PETM (version 1.0)
Source: Copernicus journal article supplement (doi:10.5194/gmd-10-889-2017), 2017-02-23
Supplement: Supplementary file 1 [file gmd-10-889-2017-supplement.zip]

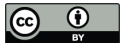

## *Supplement of*

# **The DeepMIP contribution to PMIP4: experimental design for model simulations of the EECO, PETM, and pre-PETM (version 1.0)**

**D. J. Lunt et al.**

*Correspondence to:* Daniel J. Lunt ([d.j.lunt@bristol.ac.uk](mailto:d.j.lunt@bristol.ac.uk))

- [gmd-10-889-2017-supplement-title-page.pdf](#)
- [Supp\\_Info\\_Final](#)
  - [BIOME4-CLM4\\_translation\\_table.xlsx](#)
  - [Herold2014\\_TPW.nc](#)
  - [LatLon\\_55Ma\\_PD\\_Baatsen2016.nc](#)
  - [LatLon\\_55Ma\\_PD\\_Herold2014.nc](#)
  - [LatLon\\_PD\\_55Ma\\_Baatsen2016.nc](#)
  - [LatLon\\_PD\\_55Ma\\_Herold2014.nc](#)
  - [README.txt](#)

The copyright of individual parts of the supplement might differ from the CC-BY 3.0 licence.
